# Supplementary material for: Novel piperazine core compound induces death in human liver cancer cells: possible pharmacological properties
Source: PubMed Central journal article supplement (PMC4829832; doi:10.1038/srep24172), 2016-04-13

Novel piperazine core compound induces death in human liver cancer cells; possible pharmacological properties

Nima Samie, Batoul Sadat Haerian, Sekaran Muniandy, M.S. Kanthimathi, Raja Elina Raja Azudin

**Supplementary figure 1.** Mass spectra (MS-ES<sup>+</sup>) of PCC

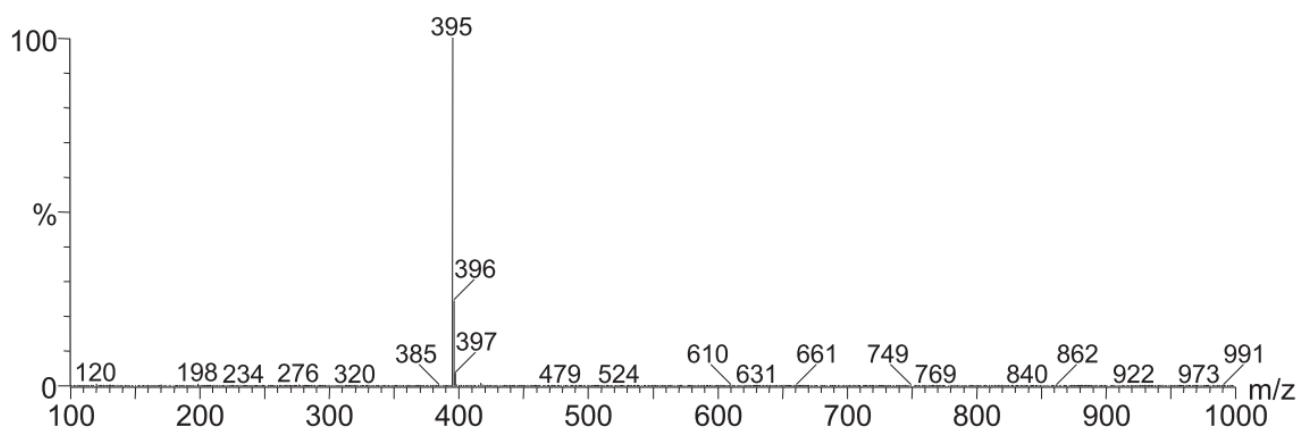

Supplementary figure 2A.  $^1\text{H}$  NMR spectrum (400 MHz,  $\text{DMSO-}d_6$ )

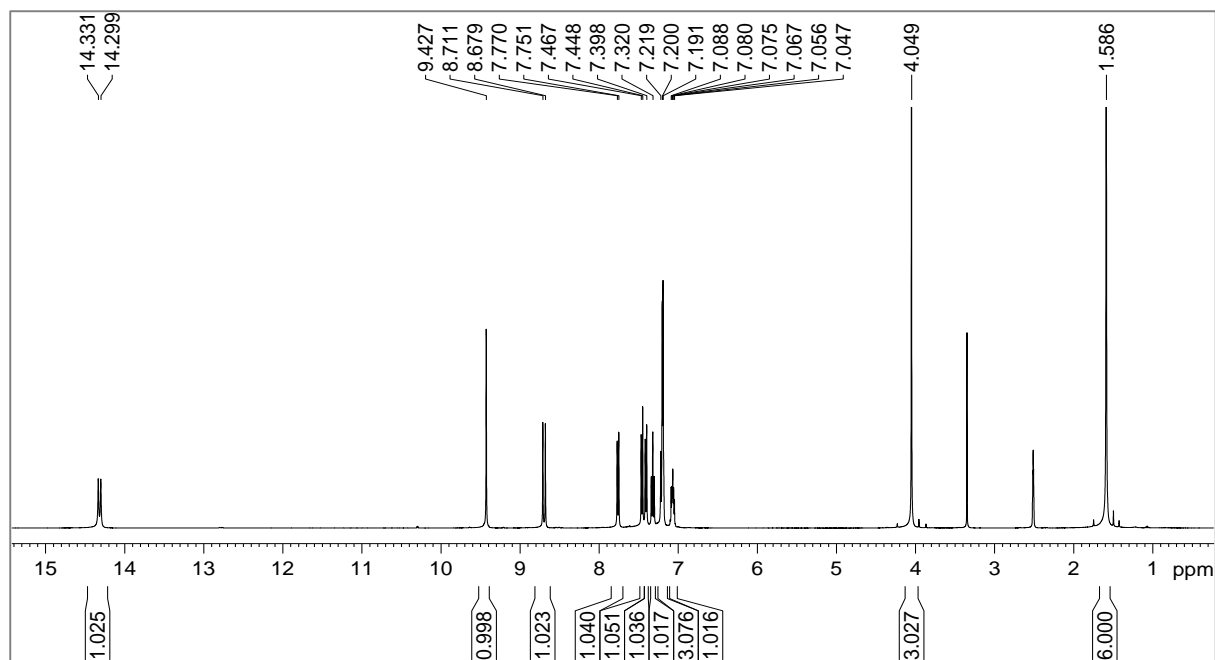

Supplementary figure 2B.  $^{13}\text{C}$  NMR spectrum (100 MHz,  $\text{DMSO-}d_6$ )

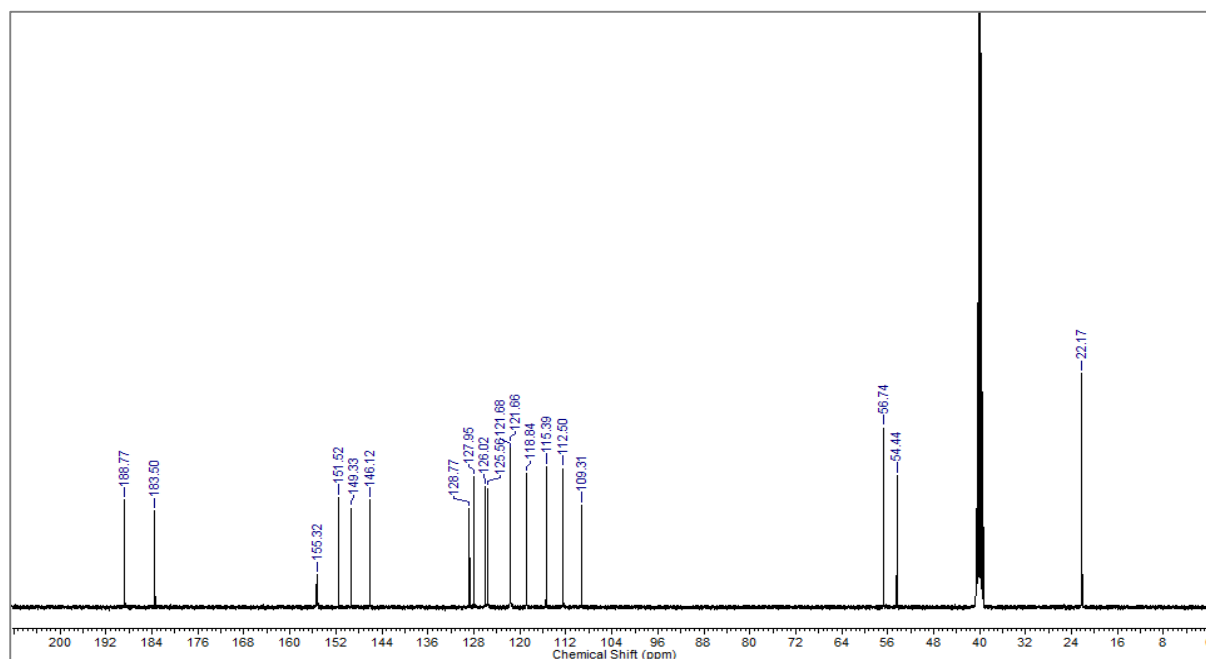

**Supplementary figure 3.** UV-spectrum of PCC in hydrochloric acid

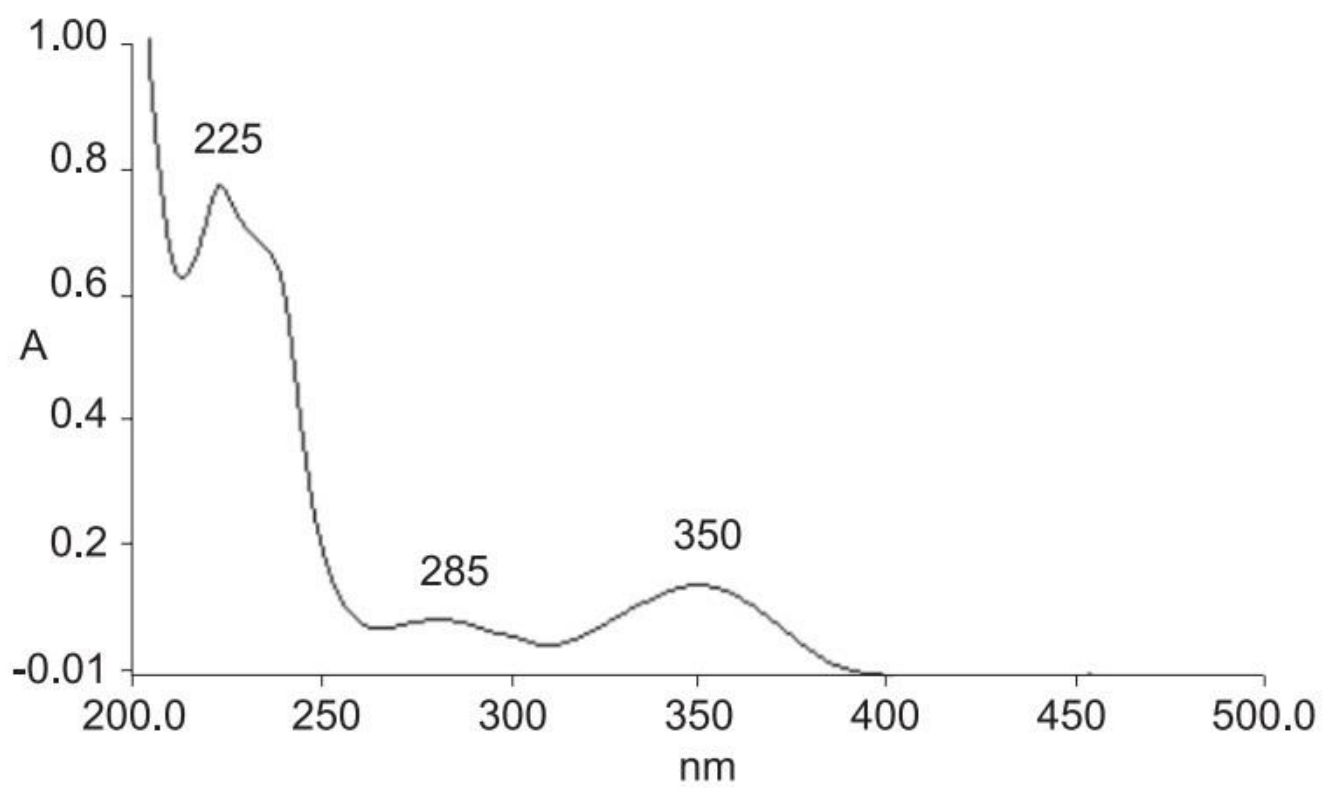

**Supplementary figure 4.** Chemical structure of PCC.

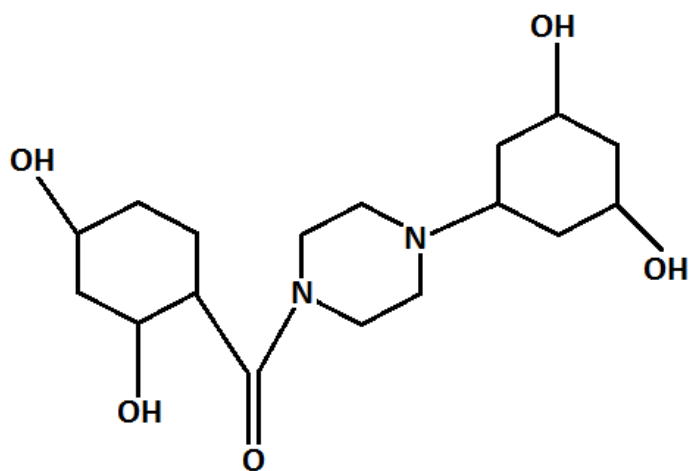

Supplement: srep24172-s1.pdf [file srep24172-s1.pdf]
